# Supplementary material for: Ce-Doped zero-valent iron nanoparticles as a Fenton-like catalyst for degradation of sulfamethazine
Source: Royal Society of Chemistry journal article supplement (doi:10.1039/c6ra23709f), 2016-01-01
Supplement: c6ra23709f1.pdf [file c6ra23709f1.pdf]

## Supplement Information

### **Ce-doped zero-valent iron nanoparticles as Fenton-like catalyst for degradation of sulfamethazine**

Zhong Wan<sup>1</sup>, Jianlong Wang<sup>1, 2 \*</sup>

1 Collaborative Innovation Center for Advanced Nuclear Energy Technology, INET, Tsinghua University, Beijing 100084, P. R. China

2 Beijing Key Laboratory of Radioactive Waste Treatment, Tsinghua University, Beijing 100084, P.R. China

\* Corresponding author

Tsinghua University, Beijing 100084, P. R. China

Tel.: +86 10 62784843

Fax: +86 10 62771150

E-mail address: [wangjl@tsinghua.edu.cn](mailto:wangjl@tsinghua.edu.cn)

Zhong Wan

Institute of Nuclear Energy Technology (INET), Tsinghua University, Beijing 100084, P.R. China

Email: [dzlyqlzq@163.com](mailto:dzlyqlzq@163.com)

---

\* Corresponding author. Tel.: +86 10 62784843; fax: +86 10 62771150.  
*E-mail address:* [wangjl@tsinghua.edu.cn](mailto:wangjl@tsinghua.edu.cn)

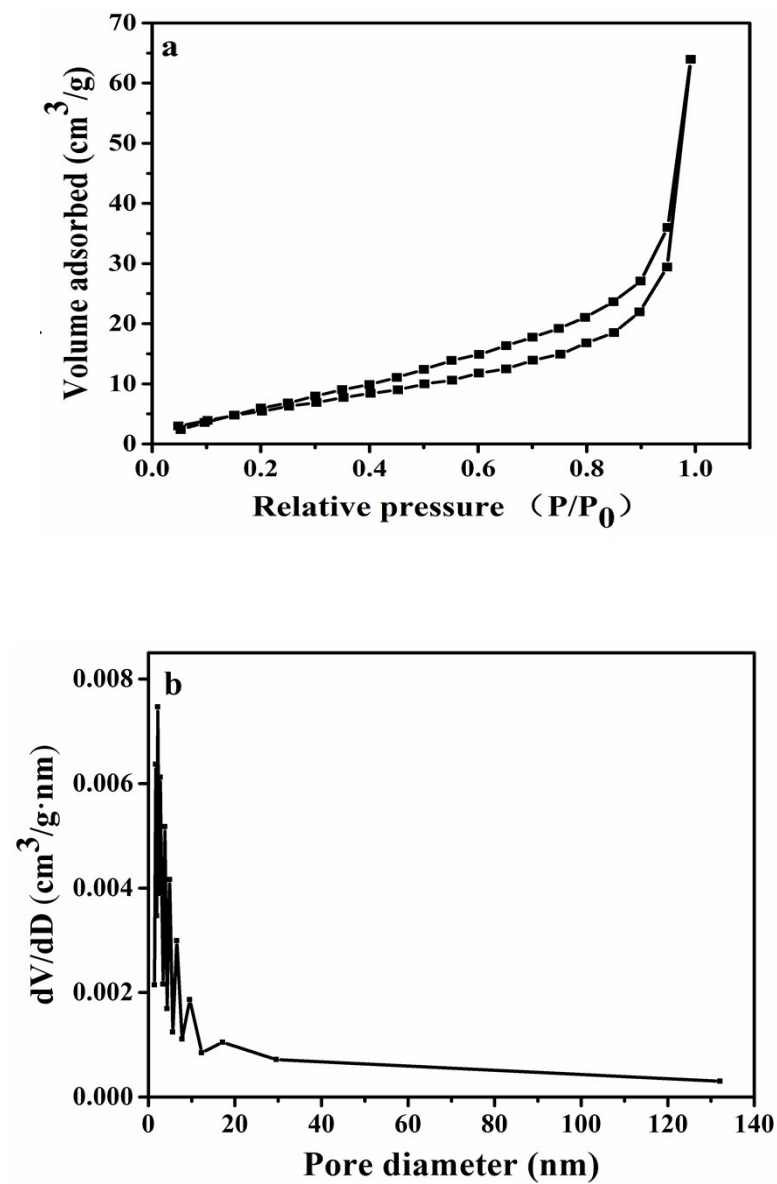

**Fig. S1.** Nitrogen adsorption/ desorption isotherm (a) and BJH pore size distribution (b) of Ce/Fe composites

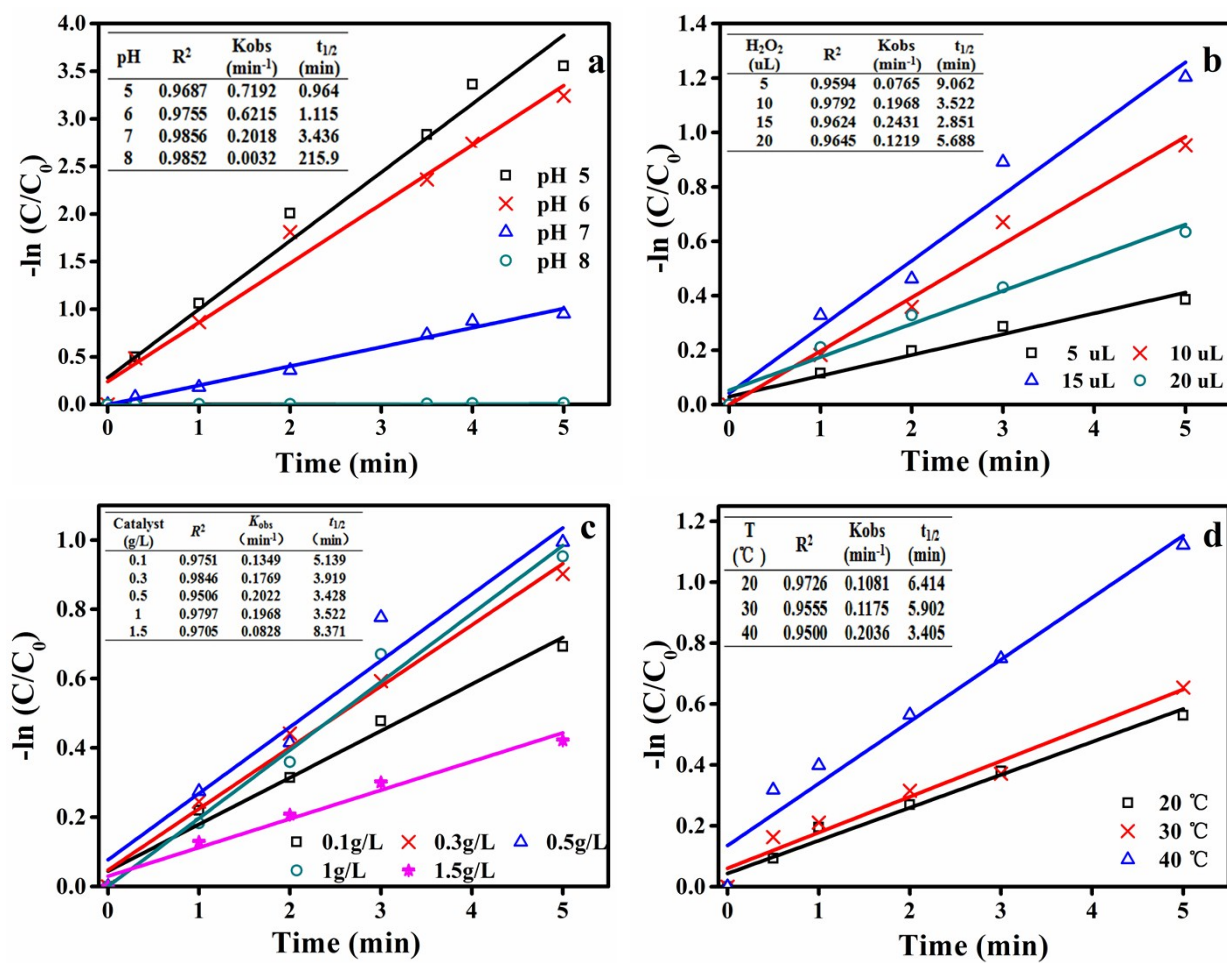

**Fig. S2.** First-order kinetics for SMT degradation in Fenton-like process (Parameters are the same as Fig. 10)
